# Supplementary material for: Abf1 Is an Essential Protein That Participates in Cell Cycle Progression and Subtelomeric Silencing in Candida glabrata
Source: MDPI journal article supplement (doi:10.3390/jof7121005), 2021-11-25
Supplement: s1 [file s1]

Supplementary tables:

Table S1 *C. glabrata* and *E. coli* strains used in this study.

| <i>E. coli</i> strain                                            | Use                    | Genotype                                                                                                                                                                                                                           | Reference                       |
|------------------------------------------------------------------|------------------------|------------------------------------------------------------------------------------------------------------------------------------------------------------------------------------------------------------------------------------|---------------------------------|
| DH10B                                                            | Electrocompetent cells | F <sup>-</sup> <i>mcrA</i> $\Delta$ ( <i>mrr-hsdRMS-mcrBC</i> ) 80 <i>dlacZ</i> $\Delta$ M15 $\Delta$ <i>lacX74</i> <i>deoR recA1 endA1 araD139</i> $\Delta$ ( <i>ara,leu</i> )7697 <i>galU galK</i> <sup>-</sup> <i>rpsL nupG</i> | Calvin and Hanawalt 1988        |
| <i>C. glabrata</i> strains                                       | Parental               | Genotype                                                                                                                                                                                                                           | Reference                       |
| BG14                                                             | BG2                    | <i>ura3</i> $\Delta$ ::Tn903 G418 <sup>R</sup>                                                                                                                                                                                     | Cormack and Falkow 1999         |
| <b><i>abf1</i><math>\Delta</math> and <i>abf1-43</i></b>         |                        |                                                                                                                                                                                                                                    |                                 |
| CGM2746                                                          | BG14                   | <i>abf1</i> $\Delta$ ::NAT <sup>R</sup> (pCI45 integrated)<br>pCI12 (pP <sub>ABF1</sub> :: <i>ABF1. URA3</i> )                                                                                                                     | This work                       |
| CGM3068                                                          | BG14                   | <i>abf1-43</i> ::NAT (pCI32 integrated <i>BsgI</i> )                                                                                                                                                                               | This work                       |
| CGM3113                                                          | CGM3068                | <i>abf1-43</i> :: <i>FRT</i><br>Nat <sup>S</sup>                                                                                                                                                                                   | This work                       |
| CGM3584                                                          | CGM2746                | <i>abf1</i> $\Delta$ :: <i>FRT</i><br>pCI12 (pP <sub>ABF1</sub> :: <i>ABF1.URA3</i> )<br>Nat <sup>S</sup> Ura <sup>+</sup>                                                                                                         | This work                       |
| <b><i>URA3</i> reporter gene integrated at <i>EPA1</i> locus</b> |                        |                                                                                                                                                                                                                                    |                                 |
| CGM147                                                           | BG14                   | <i>ura3</i> $\Delta$ ::Tn903 G418 <sup>R</sup> Tn7 at intergenic region between <i>EPA1</i> and <i>EPA2</i> (pAP508 <i>SpeI/BcgI</i> ). Insertion 1 at Tel E-R                                                                     | De Las Peñas <i>et al.</i> 2003 |
| CGM148                                                           | BG14                   | <i>ura3</i> $\Delta$ ::Tn903 G418 <sup>R</sup> Tn7 at intergenic region between <i>EPA2</i> and <i>EPA3</i> (pAP559 <i>BsrGI/SphI</i> ). Insertion 2 at Tel                                                                        | De Las Peñas <i>et al.</i> 2003 |

|                                                                                  |        |                                                                                                                                                                  |                                     |
|----------------------------------------------------------------------------------|--------|------------------------------------------------------------------------------------------------------------------------------------------------------------------|-------------------------------------|
|                                                                                  |        | E-R                                                                                                                                                              |                                     |
| CGM149                                                                           | BG14   | <i>ura3Δ::Tn903 G418<sup>R</sup> Tn7</i> at intergenic region between <i>EPA3</i> and telomere (pAP553 <i>PstI/EcoRI</i> ). Insertion 3 at Tel E-R               | De Las Peñas <i>et al.</i> 2003     |
| <b><i>URA3</i> reporter gene integrated at <i>EPA4</i> and <i>EPA5</i> locus</b> |        |                                                                                                                                                                  |                                     |
| CGM159                                                                           | BG14   | <i>ura3Δ::Tn903 G418<sup>R</sup> Tn7</i> at unique region between <i>EPA5</i> and <i>EPA4</i> (pAP534 <i>Bcg I</i> ) Insertion 2 at Tel I-R                      | De Las Peñas <i>et al.</i> 2003     |
| CGM160                                                                           | BG14   | <i>ura3Δ::Tn903 G418<sup>R</sup> Tn7</i> at intergenic region between <i>EPA4</i> and telomere (pAP471 <i>ApaL I/Xba I</i> ) Insertion 1 at Tel I-R              | De Las Peñas <i>et al.</i> 2003     |
| <b><i>URA3</i> reporter gene integrated at the <i>MTL3</i> locus</b>             |        |                                                                                                                                                                  |                                     |
| CGM454                                                                           | BG14   | <i>ura3Δ::Tn903 G418<sup>R</sup> Tn7</i> at 643 bp downstream from alpha1 stop codon (pRZ36/ <i>SpeI</i> ) Insertion 4 at Tel B-L                                | Ramirez-Zavaleta <i>et al.</i> 2010 |
| CGM458                                                                           | BG14   | <i>ura3Δ::Tn903 G418<sup>R</sup> Tn7</i> at 166 bp upstream from alpha1 start codon, between alpha1 and alpha3 (pRZ32/ <i>BcgI</i> ). Insertion 5 at Tel B-L     | Ramirez-Zavaleta <i>et al.</i> 2010 |
| CGM697                                                                           | BG14   | <i>ura3Δ::Tn903 G418<sup>R</sup> Tn7</i> at 131 bp downstream from alpha3 stop codon between alpha3 and <i>CHAI</i> (pRZ40/ <i>BcgI</i> ) Insertion 6 at Tel B-L | Ramirez-Zavaleta <i>et al.</i> 2010 |
| <b><i>abf1-43</i> derivatives in <i>URA3</i> reporter strains background</b>     |        |                                                                                                                                                                  |                                     |
| CGM2485                                                                          | CGM147 | <i>ura3Δ::Tn903 G418<sup>R</sup> Tn7</i> at                                                                                                                      | This work                           |

|         |         |                                                                                                                                                                                                |           |
|---------|---------|------------------------------------------------------------------------------------------------------------------------------------------------------------------------------------------------|-----------|
|         |         | intergenic region between <i>EPA1</i> and <i>EPA2</i> . <i>abf1-43::NAT</i> (pCI32/ <i>BsgI</i> integrated)                                                                                    |           |
| CGM2488 | CGM148  | <i>ura3Δ::Tn903 G418<sup>R</sup> Tn7</i> at intergenic region between <i>EPA2</i> and <i>EPA3</i> . <i>abf1-43::NAT</i> (pCI32/ <i>BsgI</i> integrated)                                        | This work |
| CGM2491 | CGM149  | <i>ura3Δ::Tn903 G418<sup>R</sup> Tn7</i> at intergenic region between <i>EPA3</i> and telomere. <i>abf1-43::NAT</i> (pCI32/ <i>BsgI</i> integrated)                                            | This work |
| CGM3113 | CGM3068 | <i>abf1-43::FRT</i> (pCI32 <i>BsgI</i> integrated)                                                                                                                                             | This work |
| CGM3167 | CGM159  | <i>ura3Δ::Tn903 G418<sup>R</sup> Tn7</i> at intergenic region between <i>EPA5</i> and <i>EPA4</i> . <i>abf1-43::NAT</i> (pCI32/ <i>BsgI</i> integrated)                                        | This work |
| CGM3150 | CGM160  | <i>ura3Δ::Tn903 G418<sup>R</sup> Tn7</i> at region between <i>EPA4</i> and telomere. <i>abf1-43::NAT</i> (pCI32/ <i>BsgI</i> integrated)                                                       | This work |
| CGM3168 | CGM697  | <i>ura3Δ::Tn903 G418<sup>R</sup> Tn7</i> at 131 bp downstream from alpha3 stop codon between alpha3 and <i>CHAI</i> (pRZ40/ <i>BcgI</i> ). <i>abf1-43::NAT</i> (pCI32/ <i>BsgI</i> integrated) | This work |
| CGM3069 | CGM458  | <i>ura3Δ::Tn903 G418<sup>R</sup> Tn7</i> at 166 bp upstream from alpha1 start codon, between alpha1 and alpha3 (pRZ32/ <i>BcgI</i> ). <i>abf1-43::NAT</i> (pCI32/ <i>BsgI</i> integrated)      | This work |
| CGM3180 | CGM454  | <i>ura3Δ::Tn903 G418<sup>R</sup></i>                                                                                                                                                           | This work |

|                                                                                                                         |         |                                                                                                                                          |           |
|-------------------------------------------------------------------------------------------------------------------------|---------|------------------------------------------------------------------------------------------------------------------------------------------|-----------|
|                                                                                                                         |         | Tn7 at 643 bp downstream<br>from alpha1 stop codon<br>(pRZ36/SpeI)<br><i>abf1-43::NAT</i> (pCI32/ <i>BsgI</i><br>integrated)             |           |
| CGM3840                                                                                                                 | CGM3113 | <i>abf1-43::FRT</i> (pCI32 integrated<br><i>BsgI</i> ) pVS1(p <sub>MET3</sub> ::FLAG-<br>linker::ABF1.NAT)                               | This work |
| CGM3842                                                                                                                 | BG14    | <i>ura3Δ::Tn903G418<sup>R</sup></i><br>pVS1(p <sub>MET3</sub> ::FLAG-<br>linker::ABF1.NAT)                                               | This work |
| CGM3884                                                                                                                 | CGM3113 | <i>abf1-43::FRT</i> (pCI32 integrated<br><i>BsgI</i> ) pRM153 (p <sub>MET3</sub> ::FLAG-<br>linker.NAT) Empty vector                     | This work |
| CGM3882                                                                                                                 | BG14    | <i>ura3Δ::Tn903G418<sup>R</sup></i><br>pRM153(p <sub>MET3</sub> ::FLAG-<br>linker.NAT) Empty vector                                      | This work |
| <b>p<sub>ABF1</sub>::ABF1, p<sub>MT1</sub>::Myc::ABF1, p<sub>MT1</sub>::Flag::ABF1 and p<sub>MET3</sub>::Flag::ABF1</b> |         |                                                                                                                                          |           |
| CGM2391                                                                                                                 | BG14    | <i>ura3Δ::Tn903 G418<sup>R</sup></i><br>pCI12 (p <sub>ABF1</sub> ::ABF1. URA3)                                                           | This work |
| CGM3123                                                                                                                 | CGM3113 | <i>ura3Δ::Tn903 G418<sup>R</sup></i><br><i>abf1-43::FRT</i> (pCI32/ <i>BsgI</i><br>integrated)<br>pCI12 (p <sub>ABF1</sub> ::ABF1. URA3) | This work |
| CGM3125                                                                                                                 | CGM3113 | <i>ura3Δ::Tn903 G418<sup>R</sup></i><br><i>abf1-43::FRT</i> (pCI32/ <i>BsgI</i><br>integrated)<br>pGBR2.0 URA3                           | This work |
| CGM3453                                                                                                                 | BG14    | <i>ura3Δ::Tn903 G418<sup>R</sup></i><br>pGH8 (p <sub>MT1</sub> ::Myc::ABF1)                                                              | This work |
| CGM3455                                                                                                                 | CGM3113 | <i>ura3Δ::Tn903 G418<sup>R</sup></i><br><i>abf1-43::FRT</i> (pCI32/ <i>BsgI</i><br>integrated)<br>pGH8 (p <sub>MT1</sub> ::Myc::ABF1)    | This work |
| CGM3588                                                                                                                 | CGM2746 | <i>abf1Δ::FRT NAT<sup>R</sup></i><br>pGH8 (p <sub>MT1</sub> ::Myc::ABF1)                                                                 | This work |
| CGM3594                                                                                                                 | CGM3584 | <i>abf1Δ::FRT Ura<sup>+</sup> NAT<sup>R</sup></i>                                                                                        | This work |

|         |         |                                                                                                                                              |           |
|---------|---------|----------------------------------------------------------------------------------------------------------------------------------------------|-----------|
|         |         | pCI12 (pP <sub>ABF1</sub> ::ABF1); pGH8<br>(pP <sub>MT1</sub> ::Myc::ABF1)                                                                   |           |
| CGM3838 | CGM3584 | <i>abf1</i> Δ::FRT Ura <sup>+</sup> NAT <sup>R</sup><br>pCI12 (pP <sub>ABF1</sub> ::ABF1); pPVS1<br>(pP <sub>MET3</sub> ::Flag-linker::ABF1) | This work |
| CGM3874 | CGM3838 | <i>abf1</i> Δ::FRT NAT <sup>R</sup> pPVS1<br>(pP <sub>MET3</sub> ::Flag-linker::ABF1)                                                        | This work |
| CGM4391 | BG14    | <i>ura3</i> Δ::Tn903 G418 <sup>R</sup> <i>ura</i> <sup>+</sup><br>pGE238 (pP <sub>MT1</sub> ::Flag-linker-<br>ABF1.URA3)                     | This work |
| CGM4393 | BG14    | <i>ura3</i> Δ::Tn903 G418 <sup>R</sup> Ura <sup>+</sup><br>pGE208 (pP <sub>MT1</sub> ::Flag-linker-<br>ABF1.URA3)                            | This work |

**Table S2 Plasmids used in this study.**

| Plasmid                                        | Relevant genotype                                                                                                                                                                                                                                                                                     | Reference                                                       |
|------------------------------------------------|-------------------------------------------------------------------------------------------------------------------------------------------------------------------------------------------------------------------------------------------------------------------------------------------------------|-----------------------------------------------------------------|
| <b>Cloning vectors</b>                         |                                                                                                                                                                                                                                                                                                       |                                                                 |
| pGRB2.0                                        | Cloning replicative vector <i>URA3</i> Ap <sup>R</sup><br>pRS406::C.g. <i>CEN ARS</i>                                                                                                                                                                                                                 | Zordan et al. 2013                                              |
| pMB11                                          | Cloning vector with an <i>StuI</i> restriction site<br>added Cm <sup>R</sup> Sac <sup>S</sup>                                                                                                                                                                                                         | Lab collection                                                  |
| <b>Replicative and epitope-tagging vectors</b> |                                                                                                                                                                                                                                                                                                       |                                                                 |
| pRS306                                         | Integrative vector Amp <sup>R</sup> <i>URA3</i> <sup>+</sup>                                                                                                                                                                                                                                          | Sikoski et al, 1989                                             |
| pCN-MET3                                       | <i>MET3</i> promoter, empty vector Amp <sup>R</sup> , NAT <sup>R</sup>                                                                                                                                                                                                                                | Zordan et al, 2013                                              |
| pCU-MET3                                       | <i>MET3</i> promoter, empty vector Amp <sup>R</sup> , <i>URA3</i> <sup>+</sup>                                                                                                                                                                                                                        | Zordan et al, 2013                                              |
| pAP599                                         | Cloning, integrative vector with two FRT direct<br>repeats flanking a hygromycin resistance<br>cassette (FRT- <i>P<sub>PGK1</sub>::hph::3'UTR<sub>HIS3</sub></i> -FRT) for<br>construction of multiple rounds of knock-out<br>mutants, Amp <sup>R</sup> , Hyg <sup>R</sup> , <i>URA3</i> <sup>+</sup> | Domergue et al,<br>2005                                         |
| pYC44                                          | Integrative vector<br>FRT::NAT::3'UTR <sub>CTAI</sub> ::FRT Amp <sup>R</sup>                                                                                                                                                                                                                          | Yañez-Carrillo et<br>al, 2015                                   |
| pVA59                                          | Replicative vector c-Myc (amino terminal) pCU-<br><i>MET3</i> ::c-Myc-linker Amp <sup>R</sup> , <i>URA3</i> <sup>+</sup>                                                                                                                                                                              | Laboratory<br>collection-Vidal-<br>Aguiar<br>unpublished        |
| pVA78                                          | Replicative vector pGRB2.3                                                                                                                                                                                                                                                                            | Laboratory<br>collection-Vidal-<br>Aguiar et al,<br>unpublished |
| pVA98                                          | <i>P<sub>MT1</sub></i> empty vector Amp <sup>R</sup> , <i>URA3</i> <sup>+</sup> pCU:: <i>P<sub>MT1</sub></i>                                                                                                                                                                                          | Laboratory<br>collection-Vidal-<br>Aguiar et al,<br>unpublished |
| pVA106                                         | <i>P<sub>MT1</sub></i> empty vector Amp <sup>R</sup> , NAT <sup>R</sup> pCN:: <i>P<sub>MT1</sub></i>                                                                                                                                                                                                  | Laboratory<br>collection-Vidal-<br>Aguiar et al,<br>unpublished |
| pCI32                                          | 3'UTR of <i>ABF1</i> released from pCI9 with<br><i>KpnI/XhoI</i> , cloned into pCI30.<br><i>pabf1-43::FRT::NAT::FRT::3'UTR<sub>ABF1</sub></i>                                                                                                                                                         | This work                                                       |
| pCI37                                          | A 1.2 Kb of the 5'UTR of <i>ABF1</i> , cloned into the<br><i>StuI</i> digested pMB11 vector.<br>p5'UTR <sub>ABF1</sub>                                                                                                                                                                                | This work                                                       |

|        |                                                                                                                                                                                                                                        |           |
|--------|----------------------------------------------------------------------------------------------------------------------------------------------------------------------------------------------------------------------------------------|-----------|
| pCI42  | 5'UTR of <i>ABF1</i> released with <i>Bam</i> HI/ <i>Sac</i> I from pCI37, and cloned into pYC44 digested with <i>Bam</i> HI/ <i>Sac</i> I.<br><i>p5'UTR<sub>ABF1</sub>::FRT::NAT::FRT</i>                                             | This work |
| pCI45  | <i>ABF1</i> deletion vector. 3'UTR of <i>ABF1</i> released from pCI9 with <i>Xho</i> I/ <i>Kpn</i> I, and cloned into pCI42 digested with <i>Xho</i> I/ <i>Kpn</i> I.<br><i>p5'UTR<sub>ABF1</sub>-FRT-NAT-FRT-3'UTR<sub>ABF1</sub></i> | This work |
| pGH3   | A 570 bp fragment of cMyc-linker released from pVA59 with <i>Spe</i> I/ <i>Cla</i> I, and cloned into pVA106 digested <i>Spe</i> I/ <i>Cla</i> I.<br><i>pP<sub>MT1</sub>::Myc.NAT</i>                                                  | This work |
| pGH5   | A 1.440 Kb PCR product of <i>ABF1</i> with <i>Cla</i> I sites added, and cloned into pMB11 digested with <i>Stu</i> I.<br><i>pABF1</i>                                                                                                 | This work |
| pGH8   | A 1.44 Kb fragment of <i>ABF1</i> released from pGH5 with <i>Cla</i> I, and cloned into pGH3 digested with <i>Cla</i> I.<br><i>pP<sub>MT1</sub>::Myc::ABF1.NAT</i>                                                                     | This work |
| pGH9   | A 2.1 Kb fragment of <i>hph</i> cassette released from pAP599 with <i>Xba</i> I and treated with T4 DNA Pol, and cloned into pMZ18 digested with <i>Stu</i> I/ <i>Sna</i> BI.<br><i>pP<sub>EPAL</sub>::FLP1.HPH</i>                    | This work |
| pVS1   | A 1.44 Kb fragment of <i>ABF1</i> released from pGH5 with <i>Cla</i> I and cloned into pRM153 digested with <i>Cla</i> I.<br><i>pP<sub>MET3</sub>::Flag::ABF1.NAT</i>                                                                  | This work |
| pGE208 | A 941 bp fragment of <i>P<sub>MT1</sub></i> released from pRM136 with <i>Xba</i> I/ <i>Sac</i> I, and cloned into pGE204 digested with <i>Xba</i> I/ <i>Sac</i> I.<br><i>pP<sub>MT1</sub>::Flag.URA3</i>                               | This work |
| pGE238 | A 2.024 Kb fragment of <i>Flag::ABF1::THIS3</i> released from pVS with <i>Spe</i> I/ <i>Kpn</i> I, and cloned into pVA98 digested with <i>Spe</i> I/ <i>Kpn</i> I.<br><i>pP<sub>MT1</sub>::Flag::ABF1.URA3</i>                         | This work |

**Table S3 Oligonucleotides used in this study.**

| <b>Primer<br/>(No.)</b> | <b>Sequence (5'-3')</b>                                    | <b>Site(s)<br/>added</b>     | <b>Hybridization<br/>site (<i>ABF1</i>)</b> |
|-------------------------|------------------------------------------------------------|------------------------------|---------------------------------------------|
| 2580                    | ACTTGCACTCCGGTATCCAC                                       | None                         | @1186 Fw                                    |
| 2579                    | CTCTGAACTTGGCGACATCA                                       | None                         | @796 Rv                                     |
| 2577                    | CAGTCGCGTTGCCCTATTAT                                       | None                         | @165 Fw                                     |
| 2353                    | TCT <b>atcgat</b> AAAATGGATTGACGGTATGATTCT<br>G            | <i>ClaI</i>                  | @1 Fw                                       |
| 2354                    | TCT <b>atcgat</b> TTATTGTCCTCTTAATTCAGG                    | <i>ClaI</i>                  | @1440 Rv                                    |
| 1558                    | GCTACTGCGATTGCGCACTG                                       | None                         | @-91 Fw                                     |
| 1559                    | GTT <b>Gagctc</b> TTGTGCAGACGATCCGCAGGTCAC<br>CG<br>C      | <i>SacI</i>                  | @385 Fw                                     |
| 1561                    | CTT <b>ctcgag</b> GCTCCAATTATTAATAAATGAATAAAA<br>GG        | <i>XhoI</i>                  | @+13 Fw                                     |
| 1562                    | CTT <b>ggtac</b> CTT <b>gtgcag</b> TGCCGCCAACTTAAGCAT<br>A | <i>KpnI</i> ,<br><i>BsgI</i> | @+755 Rv                                    |
| 1563                    | TGTATTCG <b>ggtacc</b> GCTAATTCCAG                         | <i>KpnI</i>                  | @+933 Rv                                    |
| 1589                    | CTT <b>Gagctc</b> GATTGTTGTGTAGGCAATATCATAG<br>C           | <i>SacI</i>                  | @-1240 Fw                                   |
| 1590                    | CTT <b>ggatcc</b> CCGAACATTTGGTCAGATCACTG                  | <i>BamHI</i>                 | @+712 Rv                                    |
| 1834                    | GGGCCCCTCCAATTATTAATAAATGAATAAAG<br>G                      | None                         | @+13 Fw                                     |
| 1835                    | CTCTGACTCCTCAATCCTTAACC                                    | None                         | @+1015 Rv                                   |
| 1880                    | GTT <b>ggatcct</b> TAGACTTCACGAGGAAGCTTGTCTG<br>TCGG       | <i>BamHI</i>                 | @1308 Rv                                    |
| 1881                    | CTT <b>ggatcc</b> CGTTGTTTGTGTTCTCGTTGG                    | <i>BamHI</i>                 | @-1 Rv                                      |
| 1884                    | AGTGCACTTATCCTCCATCC                                       | None                         | @-2134 Fw                                   |
| 1885                    | GGATCCACTAGTTCTAGAGCGGCGTTGTTTGT<br>GTTCTCGTTGG            | None                         | @-1 Rv                                      |
| 569                     | TACAAAGCTTGTTCAACATCGGAAGC                                 | None                         | NAT resistance<br>cassette Rv               |
| 1096                    | GCTTGCCTCGTCCCCG                                           | None                         | NAT resistance<br>cassette Fw               |
| 1842                    | CCGCTCTAGAACTAGTGGATCC                                     | None                         | NAT resistance<br>cassette Fw               |
| 1843                    | GGGCCCCCCTCGAGGAC                                          | None                         | NAT resistance<br>cassette Rv               |

\*The restriction sites added to the primers are indicated in small case, blue letters.



**Table S4.** Duplication times of strains containing *ABF1* driven by the *MET3* promoter under expressing or repressing conditions.

| Promoter                             | Strain                             | Duplication time (min $\pm$ SD) |                       |                      |                        |             |
|--------------------------------------|------------------------------------|---------------------------------|-----------------------|----------------------|------------------------|-------------|
|                                      |                                    | Rich                            |                       | OFF                  |                        | ON          |
|                                      |                                    | YPD                             | SC + CAA <sup>a</sup> | YNB + 2 mM met + cys | YNB + 0.2 mM met + cys | YNB         |
| Empty vector                         | WT ( <i>ABF1</i> <sup>+</sup> )    | 54 $\pm$ 2                      | 67 $\pm$ 2            | 194 $\pm$ 3          | 149 $\pm$ 25           | 112 $\pm$ 4 |
|                                      | <i>abf1-43</i>                     | 67 $\pm$ 16                     | 73 $\pm$ 4            | 211 $\pm$ 18         | 179 $\pm$ 35           | 127 $\pm$ 8 |
| <i>P<sub>ABF1</sub></i> <sup>b</sup> | <i>abf1Δ/pABF1</i>                 | 56 $\pm$ 1                      | 59 $\pm$ 0            | 118 $\pm$ 5          | 98 $\pm$ 0             | 76 $\pm$ 0  |
| <i>P<sub>MET3</sub></i> <sup>c</sup> | WT/pFlag- <i>ABF1</i>              | 55 $\pm$ 1                      | 69 $\pm$ 2            | 194 $\pm$ 6          | 162 $\pm$ 38           | 138 $\pm$ 9 |
|                                      | <i>abf1-43</i> / Flag- <i>ABF1</i> | 62 $\pm$ 2                      | 74 $\pm$ 8            | 200 $\pm$ 9          | 150 $\pm$ 29           | 142 $\pm$ 9 |
|                                      | <i>abf1Δ/ pFlag-ABF1</i>           | 0                               | 0                     | 0                    | 0                      | 127 $\pm$ 4 |

<sup>a</sup> SC medium is YNB supplemented with ammonium sulfate, 0.2% glucose and 0.6% casaminoacids

<sup>b</sup> Plasmid containing *ABF1* driven by its own promoter

<sup>c</sup> Plasmid containing cMyc-*ABF1* driven by the repressible promoter of the *MET3* gene. The *MET3* promoter is only expressed in the absence of both met and cys (YNB, ON medium).

Numbers represent the mean of at least 3 independent experiments.

**Table S5:** Cell viability of *abf1Δ*/pP<sub>MET3</sub>::Flag-*ABF1* strains under repression of *ABF1*

| Time (h)                        | CFU <sup>a</sup>       |                        |
|---------------------------------|------------------------|------------------------|
|                                 | MEDIA <sup>b</sup>     |                        |
|                                 | ON                     | OFF                    |
| <b>Experiment 1<sup>c</sup></b> |                        |                        |
| 0                               | 1.04 × 10 <sup>6</sup> | 9.73 × 10 <sup>5</sup> |
| 1                               | 8.37 × 10 <sup>5</sup> | 9.97 × 10 <sup>5</sup> |
| 2                               | 1.71 × 10 <sup>6</sup> | 1.64 × 10 <sup>6</sup> |
| 3                               | 2.36 × 10 <sup>6</sup> | 1.90 × 10 <sup>6</sup> |
| 4                               | 3.42 × 10 <sup>6</sup> | 2.27 × 10 <sup>6</sup> |
| 5                               | 4.68 × 10 <sup>6</sup> | 2.40 × 10 <sup>6</sup> |
| 6                               | 7.22 × 10 <sup>6</sup> | 2.75 × 10 <sup>6</sup> |
| 24                              | 9.66 × 10 <sup>7</sup> | 5.33 × 10 <sup>4</sup> |
| <b>Experiment 2<sup>d</sup></b> |                        |                        |
| 0                               | 2.27 × 10 <sup>6</sup> | 1.10 × 10 <sup>6</sup> |
| 7                               | 3.51 × 10 <sup>7</sup> | 3.70 × 10 <sup>6</sup> |
| 8                               | 4.18 × 10 <sup>7</sup> | 2.37 × 10 <sup>6</sup> |
| 9                               | 4.08 × 10 <sup>7</sup> | 1.23 × 10 <sup>6</sup> |
| 10                              | 1.06 × 10 <sup>8</sup> | 6.67 × 10 <sup>5</sup> |
| 11                              | 1.18 × 10 <sup>8</sup> | 4.67 × 10 <sup>5</sup> |
| 12                              | 1.13 × 10 <sup>8</sup> | 5.33 × 10 <sup>5</sup> |
| 24                              | 1.58 × 10 <sup>8</sup> | 1.33 × 10 <sup>5</sup> |

<sup>a</sup> CFU: Colony forming units per mL of culture

<sup>b</sup> Saturated cultures of the *abf1Δ*/pP<sub>MET3</sub>::Flag-*ABF1* strain were diluted to an OD<sub>600</sub> of 0.1 into either ON media (YNB without amino acids) or OFF media (YNB + 0.2 mM met and cys) and incubated at 30°C with shaking. Samples were taken at the indicated time points, diluted and plated on YNB (ON). Colonies were counted and total colony forming units (CFU) were calculated.

<sup>c</sup> Experiment 1: Samples from cultures of either ON or OFF media were taken every hr during the first 6 h, diluted and plated on YNB (ON) plates. Colonies were counted and total colony forming units (CFU) were calculated.

<sup>d</sup> Experiment 2. Cells inoculated into either ON or OFF media were incubated for the first 6 hr after which samples were taken every hour (starting at 7 h after the cells were initially diluted into each media) and diluted and plated as described in c. All experiments were performed three times. Data from one representative experiment are shown.

**Table S6. Percentage of unbudded and budded cells under Flag-ABF1 repression and Myc-ABF1 overexpression.**

| Strain <sup>a</sup> | Plasmid <sup>a</sup>           | Effect                 | Medium <sup>b</sup> | Time <sup>c</sup> |       |        |       |
|---------------------|--------------------------------|------------------------|---------------------|-------------------|-------|--------|-------|
|                     |                                |                        |                     | 6 h               |       | 9 h    |       |
|                     |                                |                        |                     | UB (%)            | B (%) | UB (%) | B (%) |
| <i>abf1Δ</i>        | pP <sub>MET3</sub> ::Flag-ABF1 | <b>ABF1 repression</b> | ON                  | 66.3              | 34.6  | 81.4   | 18.5  |
|                     |                                |                        | OFF                 | 52.6              | 47.3  | 42.5   | 57.5  |
|                     |                                |                        |                     |                   |       |        |       |
|                     | pP <sub>MT1</sub> ::Myc-ABF1   | <b>ABF1 O-E</b>        | - Cu                | 64.8              | 35.1  | 66.2   | 33.7  |
|                     |                                |                        | + Cu                | 34.6              | 65.3  | 55.3   | 44.6  |

<sup>a</sup> *C. glabrata* null strain *abf1Δ* containing the shut off plasmid pP<sub>MET3</sub>::Flag-ABF1 or the over expressing plasmid pP<sub>MT1</sub>::Myc-ABF1.

<sup>b</sup> ON medium is minimal medium YNB where the *MET3* is active. OFF is YNB minimal medium with 0.2 mM each of methionine and cysteine where the *MET3* promoter is repressed. – Cu is YNB minimal medium and + Cu is YNB minimal medium with 50 μM CuSO<sub>4</sub> to induce the *MT-1* promoter.

<sup>c</sup> Time at which samples were taken after diluting stationary phase cells of each strain into the indicated medium. Cell suspensions were viewed and counted under the microscope and the percentage of unbudded (UB) or budded (B) cells was calculated. Budded cells include both, small and large budded.

### Supplementary Figure S1

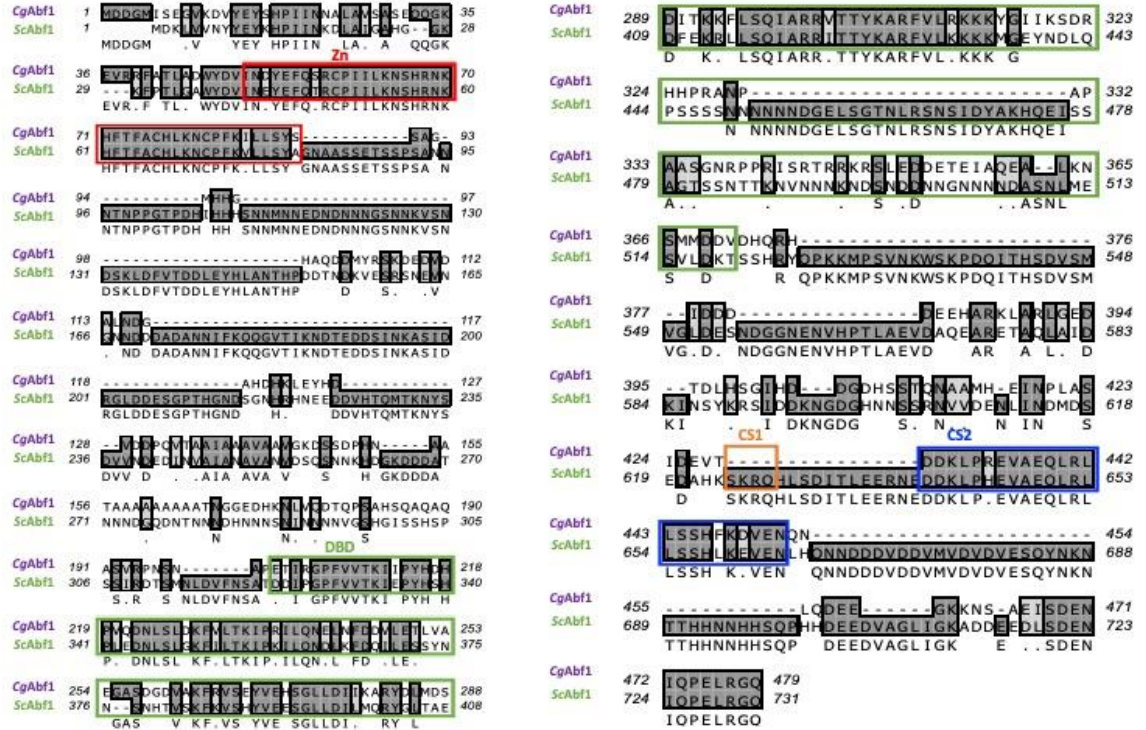

**Figure S1: CgAbf1 is similar to its ortholog ScAbf1 and conserves the functional domains.** The genome of *Candida glabrata* contains the *ABF1* gene encoding the CgAbf1, which conserves the N-terminal atypical Zn-finger domain (indicated with Zn and a red rectangle), followed by a second DNA-binding domain in the middle section of the protein, indicated as DBD with a green rectangle. At the C-terminal end the CS2 domain is well conserved (indicated as CS2 and in blue rectangle).

## Supplementary Figure S2

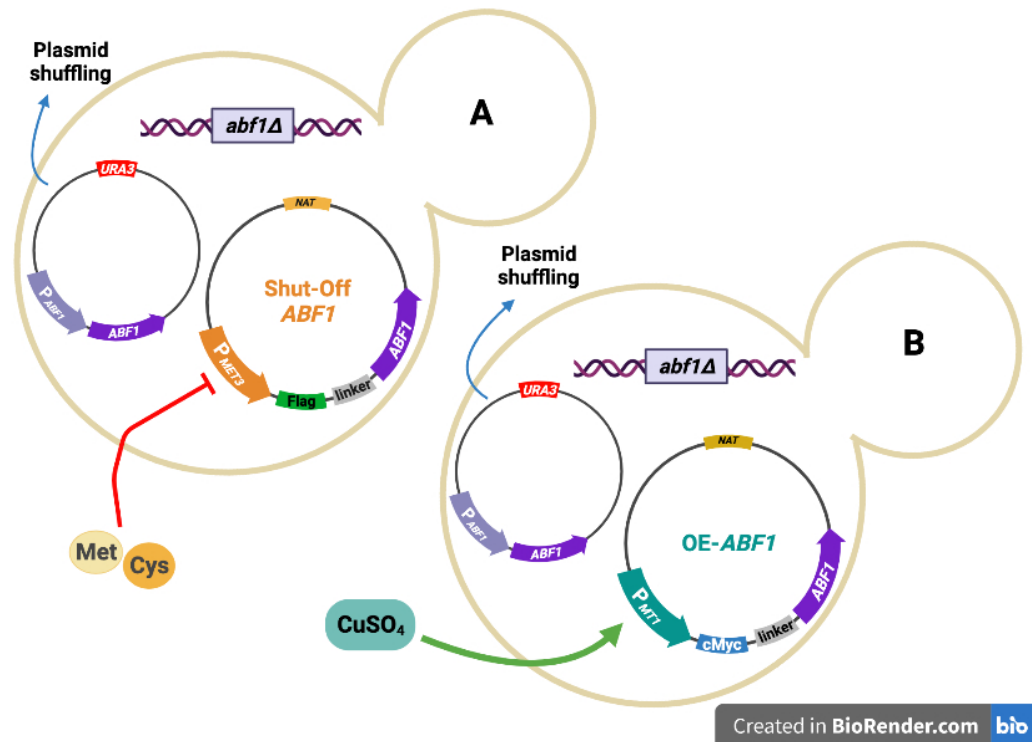

**Figure S2: Plasmid shuffling scheme to generate a “shut off *ABF1* system” or an “*ABF1* over expression system” (OE-*ABF1*) in the *abf1Δ* background**  
 Schematic representation of the plasmid shuffling strategy followed to generate the *abf1Δ*/pP<sub>MET3</sub>::Flag-*ABF1* strain (shut off system) and the *abf1Δ*/pP<sub>MT-1</sub>::cMyc-*ABF1* strain (OE system). The *abf1Δ* strain complemented with the plasmid containing the *ABF1* wild-type gene under its own promoter was transformed with either the shut off or the OE plasmid. Cells of each strain were grown under non-selective conditions to allow them to lose the wild-type *ABF1* plasmid, generating either the shut off strain (*abf1Δ*/pP<sub>MET3</sub>::Flag-*ABF1*) or the over-expressing strain (*abf1Δ*/pP<sub>MT-1</sub>::cMyc-*ABF1*). Addition of met and cys to the shut off strain leads to complete repression of *ABF1*, while addition of CuSO<sub>4</sub> to the overexpressing strain results in induction and overexpression of *ABF1* as indicated.

### Supplementary Figure S3

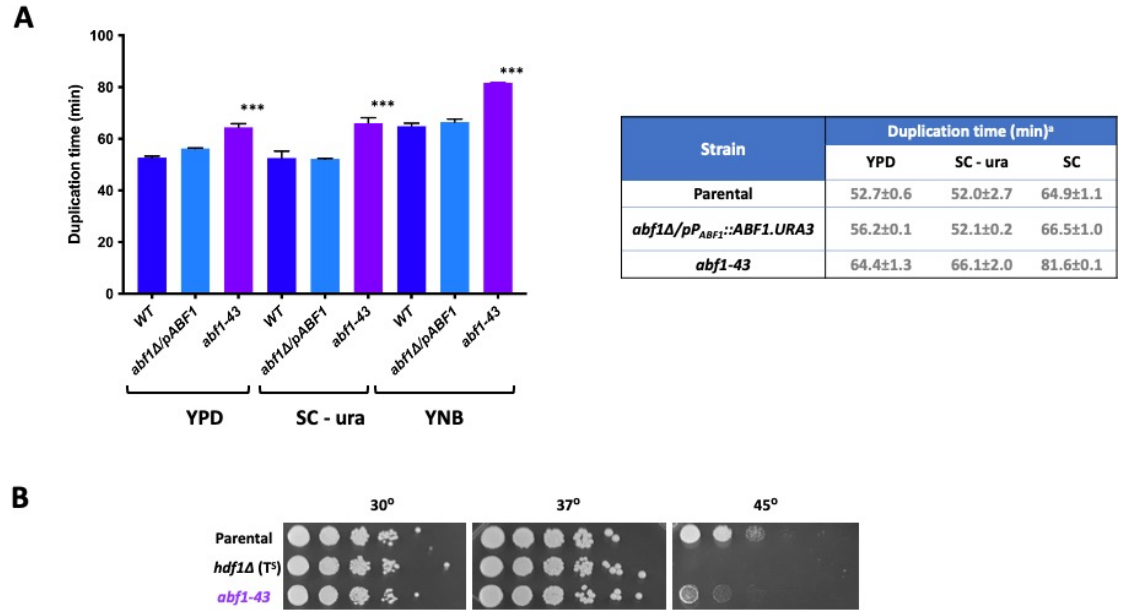

**Figure S3: *abf1-43* mutant has a longer duplication time and is temperature sensitive at 45°C.** A) Growth rate of the parental strain (*ABF1*), the *abf1Δ* strain complemented with the plasmid containing *ABF1* driven by its own promoter and the *abf1-43* mutant strain in different media: rich (YPD); SC – ura: minimal media supplemented with casamino acids (0.6% ), 2% glucose and 0.5% ammonium sulfate; SC: minimal media with 2% glucose and 0.5% ammonium sulfate. On the right side, the table with the duplication times are shown for each strain in each medium.

<sup>a</sup> Values correspond to the mean of three biological assays. B) Stationary phase cells from the indicated strains were adjusted to an OD<sub>600</sub> of 1 and 5 μL of serial 10-fold dilutions were spotted on to YPD and incubated at the indicated temperatures. The *hdf1Δ* strain is a control of a temperature-sensitive strain unable to grow at 45°C.

Supplementary Figure S4

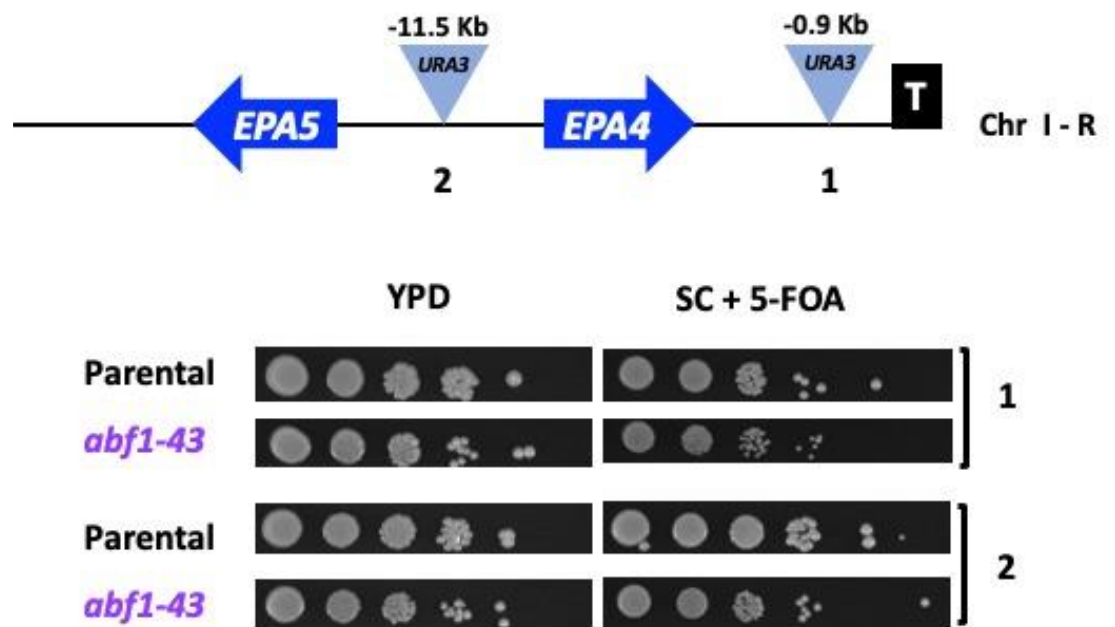

**Figure S4: *CgAbf1* is not required for silencing at positions very close to some telomeres.** Top: Schematic representation of the subtelomeric region of the Chr I-R in *C. glabrata*. The light blue triangles represent the position of two independent insertions of the *URA3* reporter introduced either in the wild-type parental strain or in the *abf1-43* truncation mutant. The distance from the telomere is indicated above each blue triangle, and the numbers beneath the triangles correspond to the insertions carried by each strain in the plate growth assay below. Ten-fold dilutions of cells grown to stationary phase were spotted onto the media indicated, incubated at 30 °C for 48 h and photographed.
